# Supplementary material for: Antibacterial AIE polycarbonates endowed with selective imaging capabilities by adjusting the electrostaticity of the mixed-charge backbone
Source: Royal Society of Chemistry journal article supplement (doi:10.1039/d1bm00894c), 2021-01-01
Supplement: d1bm00894c1.pdf [file d1bm00894c1.pdf]

# **Antibacterial AIE polycarbonates endowed with selective imaging by adjusting electrostaticity of the mixed-charge backbone**

Junyong Zhang, Wencheng Liang, Lianlei Wen, Zhimin Lu, Yan Xiao\* and Meidong Lang\*

## AUTHOR ADDRESS

Shanghai Key Laboratory of Advanced Polymeric Materials, Key Laboratory for Ultrafine Materials of Ministry of Education, School of Materials Science and Engineering, East China University of Science and Technology, Shanghai 200237, China

## CORRESPONDING AUTHOR

\*Email: [yxiao@ecust.edu.cn](mailto:yxiao@ecust.edu.cn) [mdl原因ang@ecust.edu.cn](mailto:mdl原因ang@ecust.edu.cn)

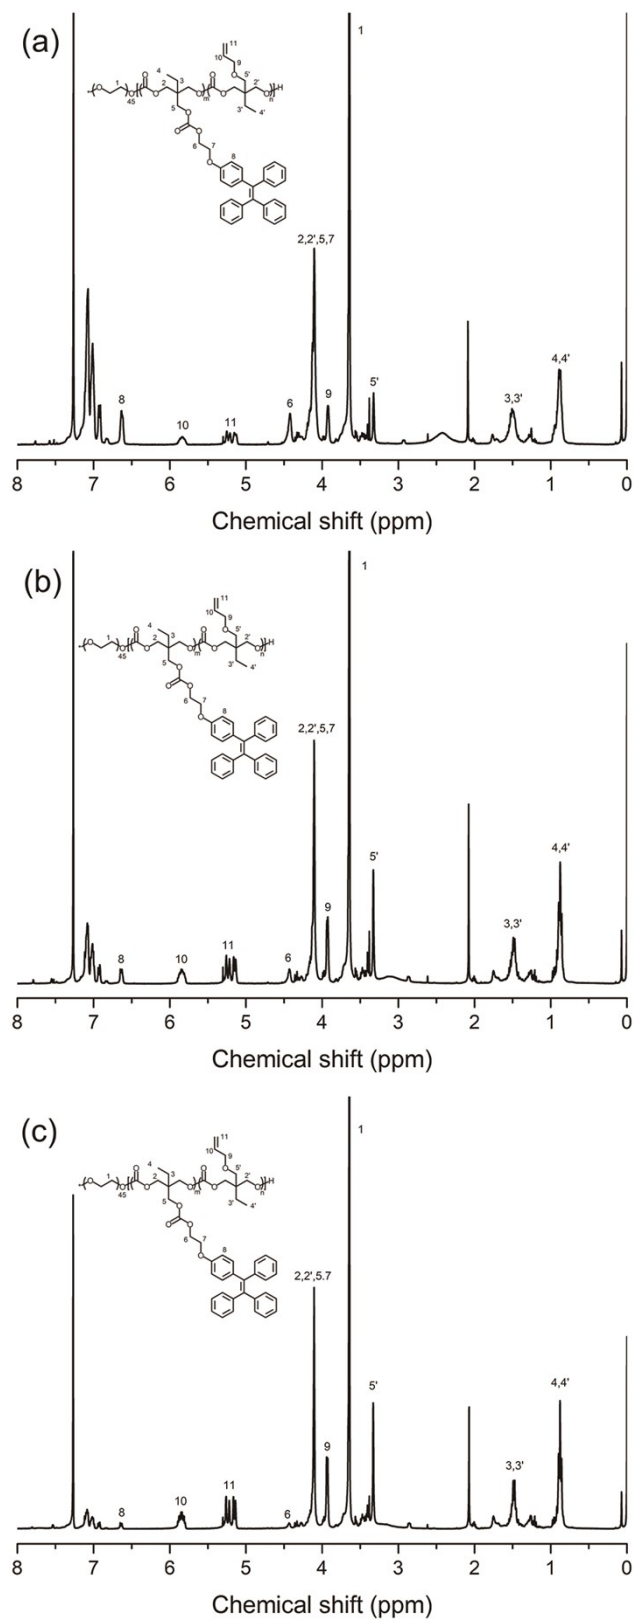

Fig. S1  $^1\text{H-NMR}$  spectra of mPEG-P(AOMEC-TPETC) (a) Entry1; (b) Entry2; (c) Entry 3.

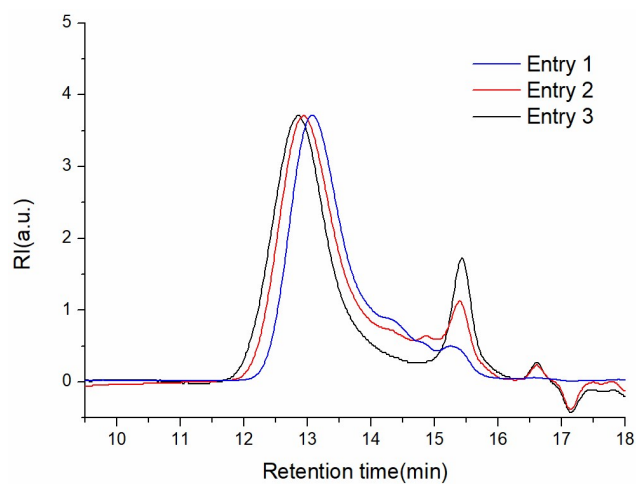

**Fig. S2** GPC curves of mPEG-P(AOMECP-TPETC).

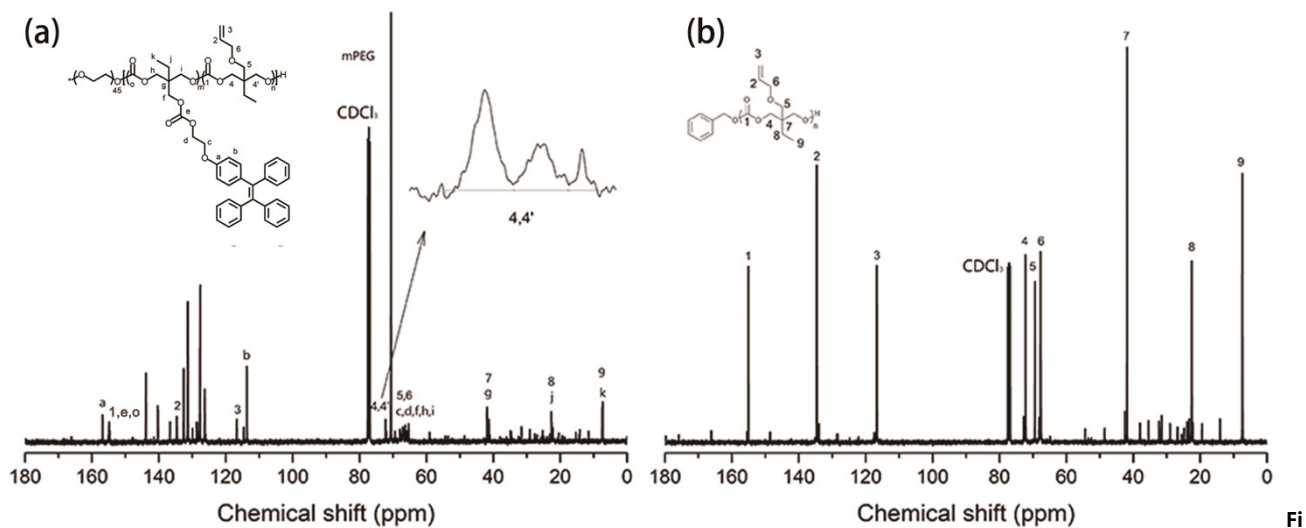

**g. S3**  $^{13}\text{C}$ -NMR spectra of (a) Entry1 and (b) P(AOMECP).

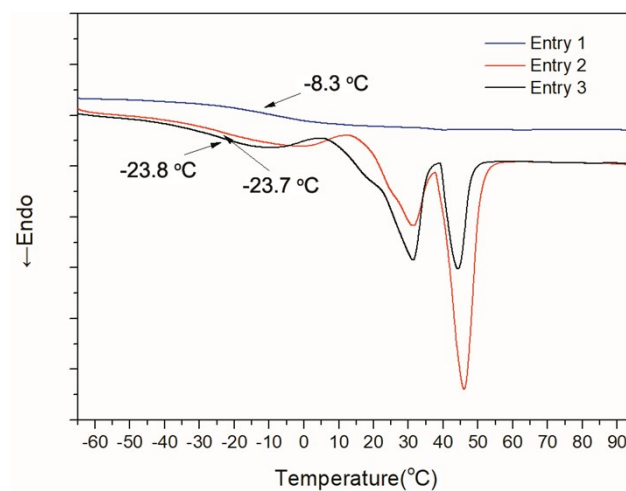

**Fig. S4** DSC curves of mPEG-P(AOMECP-TPETC).

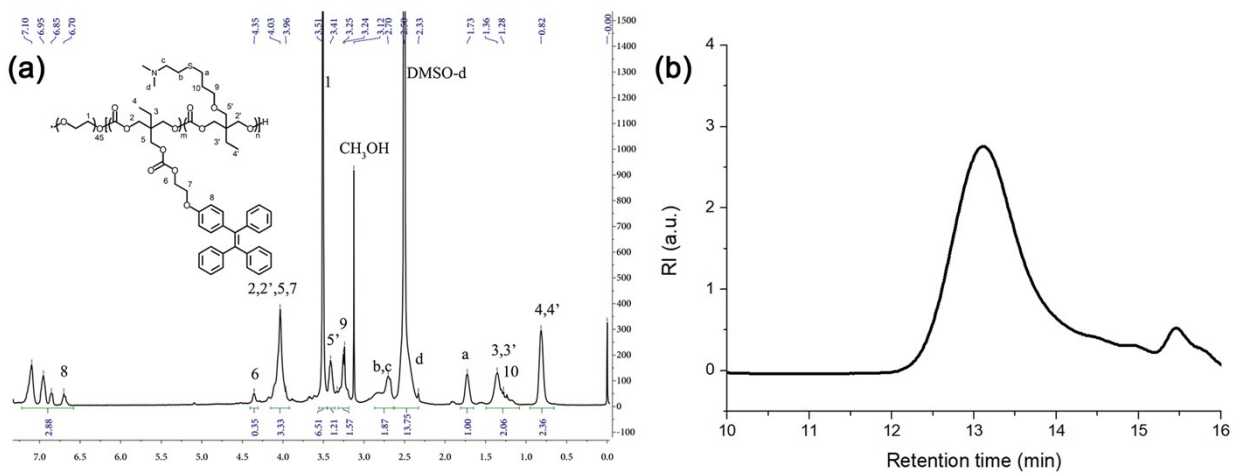

Fig. S5 (a)  $^1\text{H-NMR}$  spectrum of NI-P1; (b) GPC curve of NI-P1.

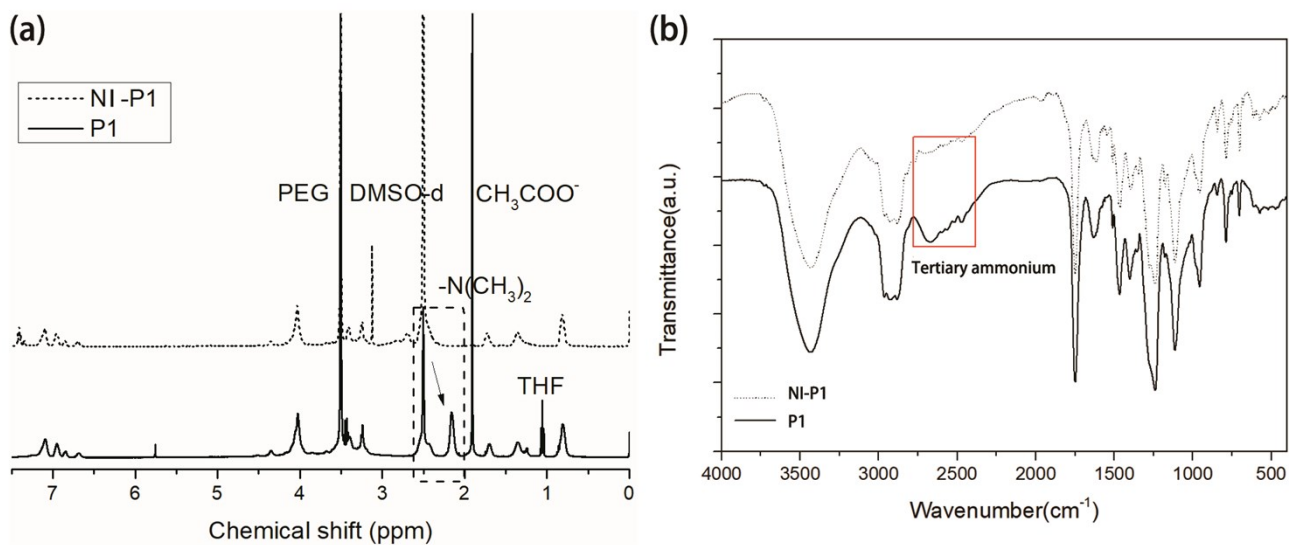

Fig. S6 (a)  $^1\text{H-NMR}$  spectra and (b) FT-IR spectra of P1 and NI-P1.

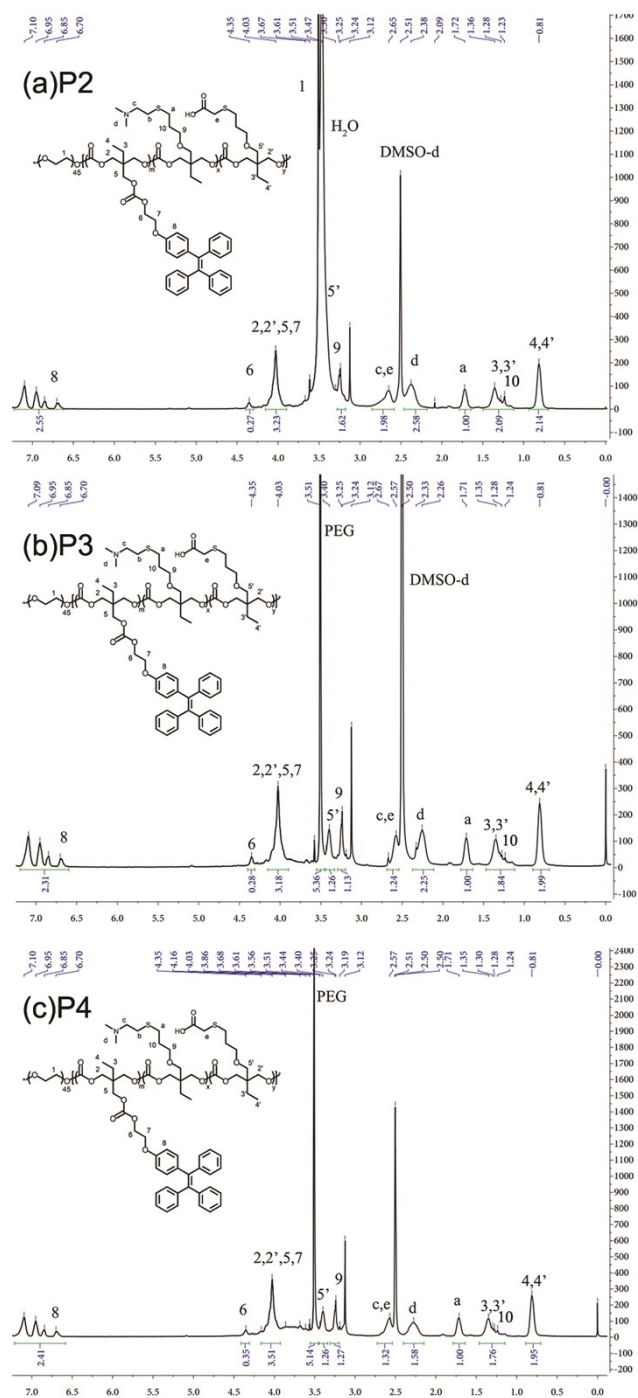

**Fig. S7**  $^1\text{H-NMR}$  spectra of mixed-charge AIE polycarbonates (a) P2, (b) P3 and (c) P4.

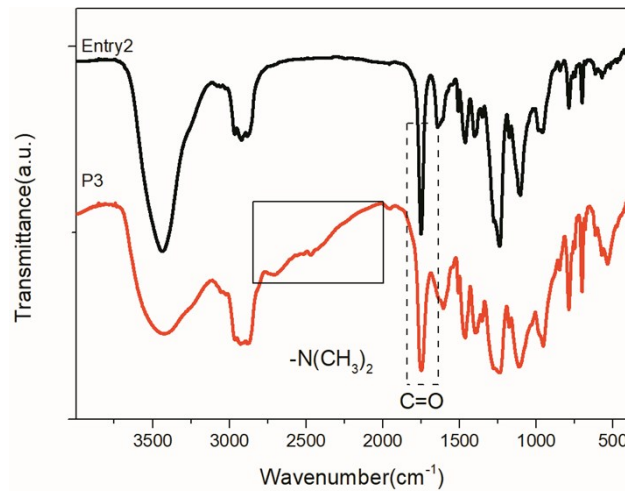

**Fig. S8** FT-IR spectra of functional polycarbonates

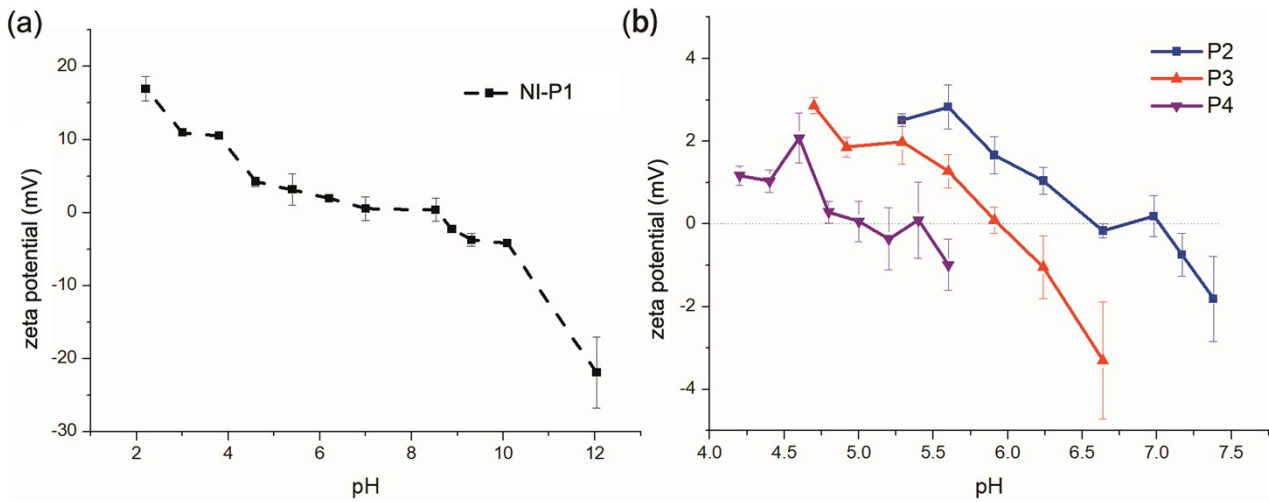

**Fig. S9** Changes in zeta potential of cationic and mix-charged polycarbonate aggregates against pH value.

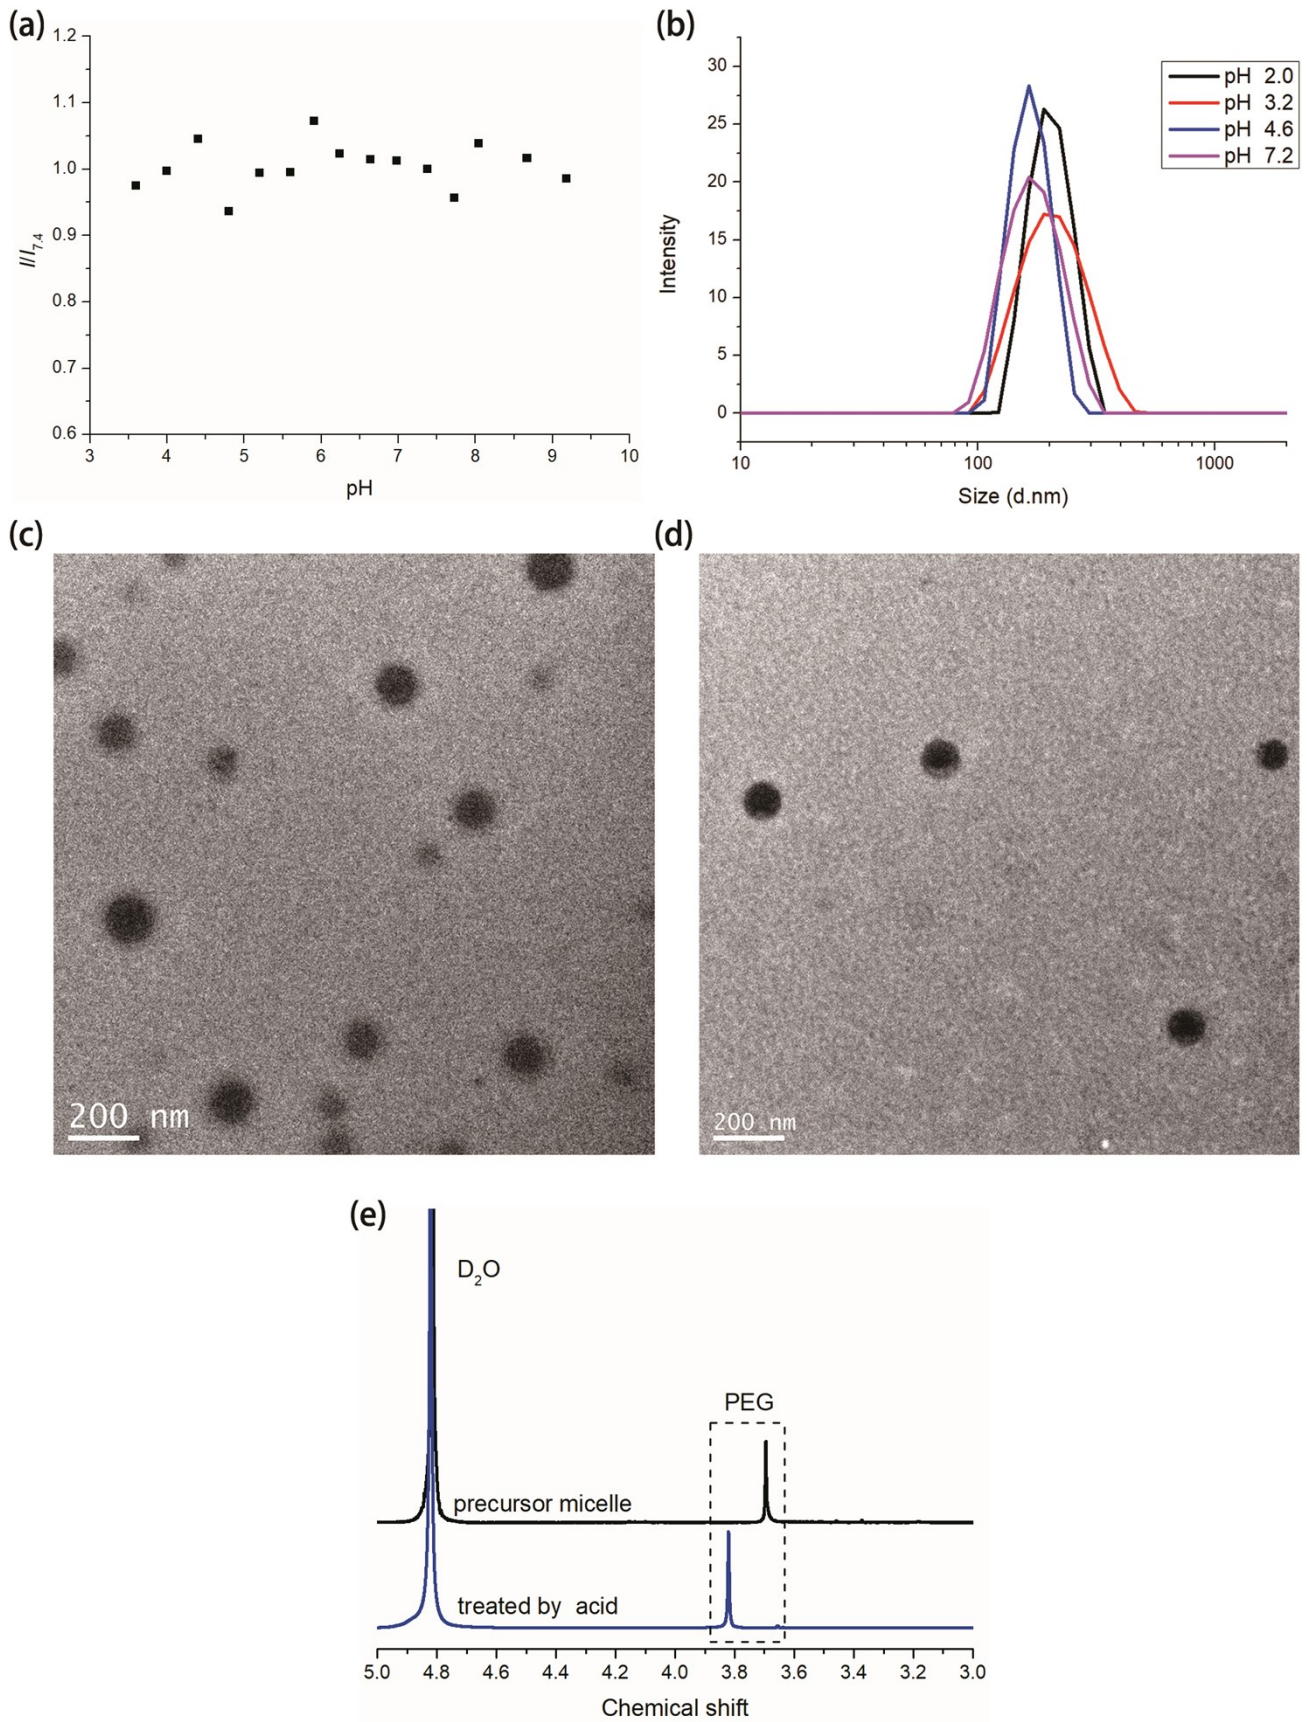

**Fig. S10** (a) Changes in fluorescence intensity of NI-P1 against pH value; (b) DLS curves of precursor at different pH; TEM photos of NI-P1 micelle at (c) pH 7.2 and (d) pH 2.2; (e)  $^1\text{H-NMR}$  spectra of NI-P1 micelle in  $\text{D}_2\text{O}$ .

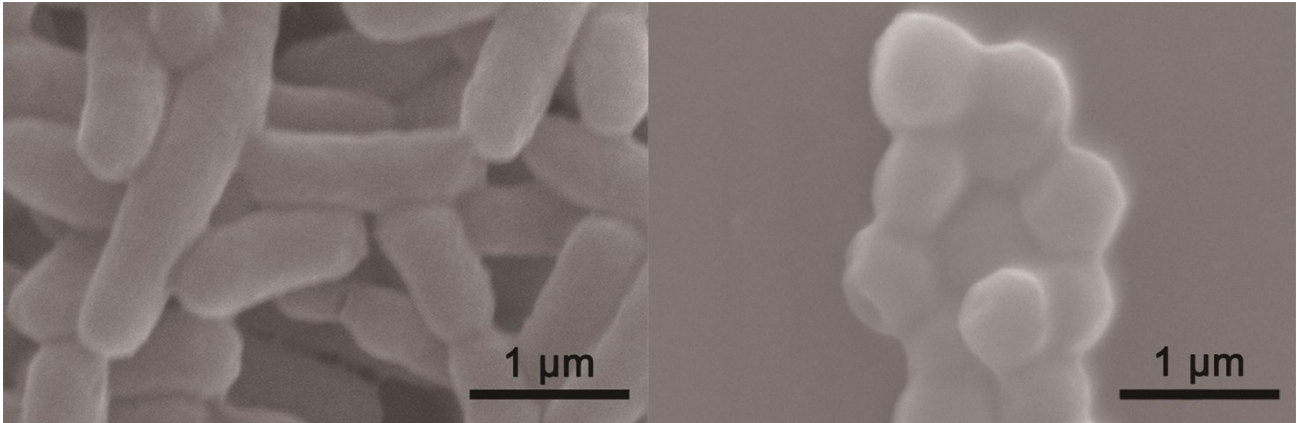

Fig. S11 SEM photos of (a) *E. coli* and (b) *S. aureus*.

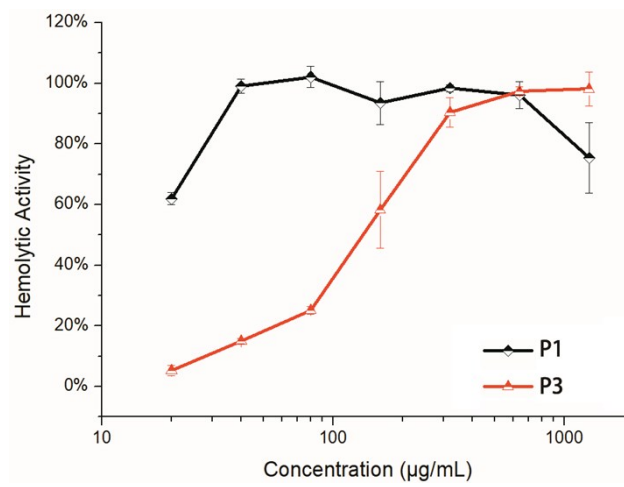

Fig. S12 Haemolysis assay of P1 and P3 with various concentrations.

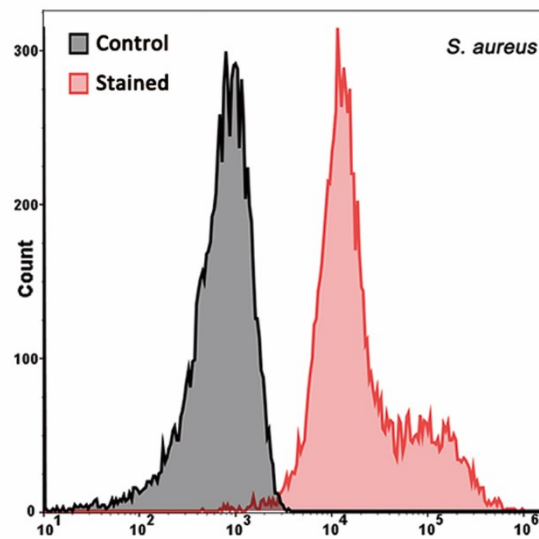

Fig. S13 Flow cytometry analyses of *S. aureus* stained by P2.
